# Supplementary material
Source: PubMed Central journal article supplement (PMC4151216)

P8 cerebellum

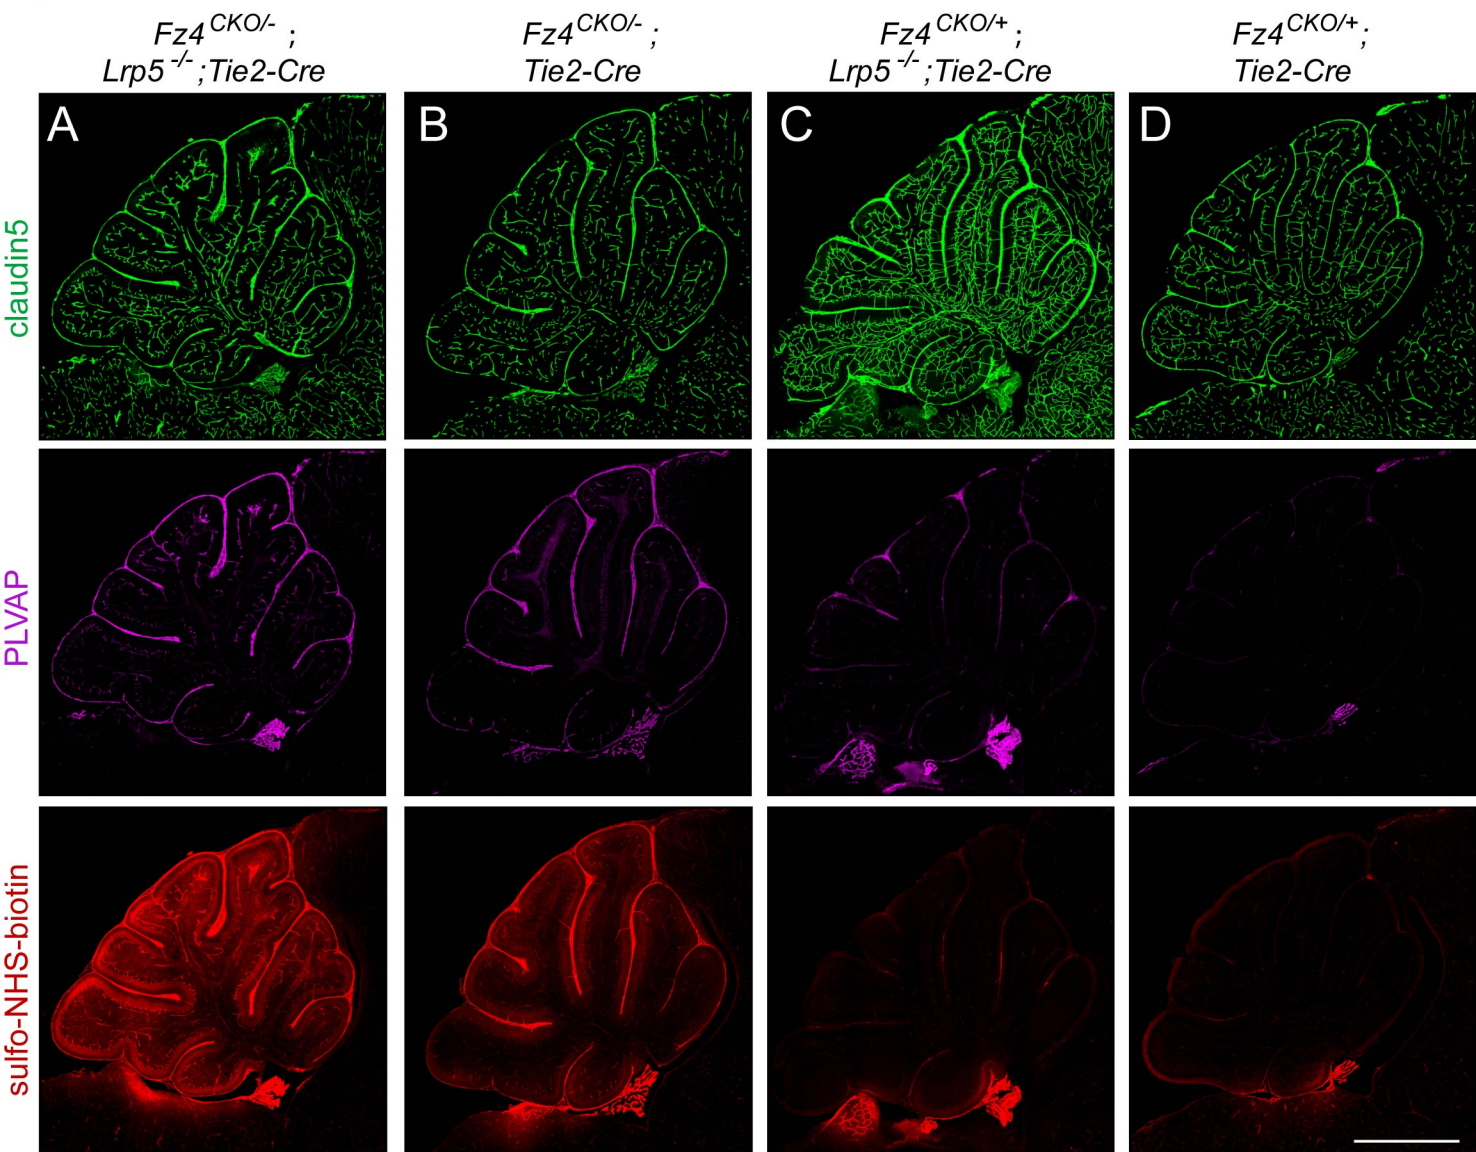

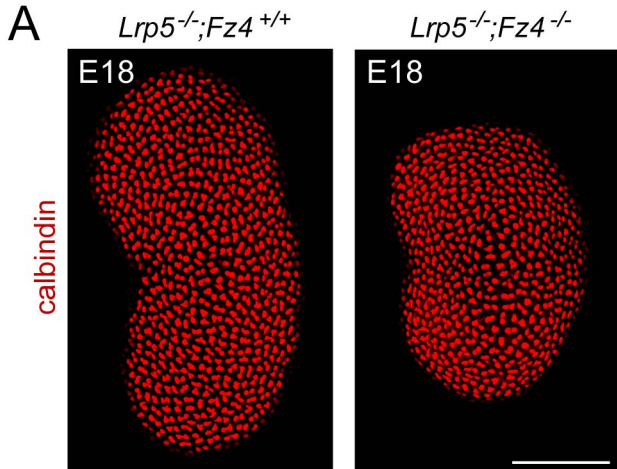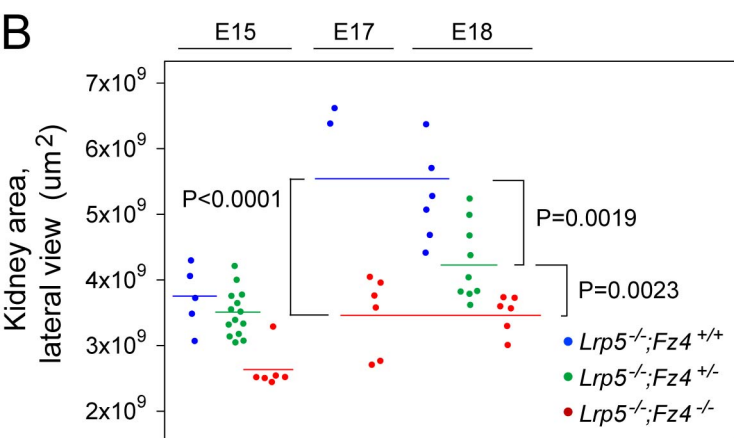

WT

*Ctnnb1*<sup>CKO/CKO</sup>,  
*Pdgfb-CreER*

P12

claudin5  
PLVAP

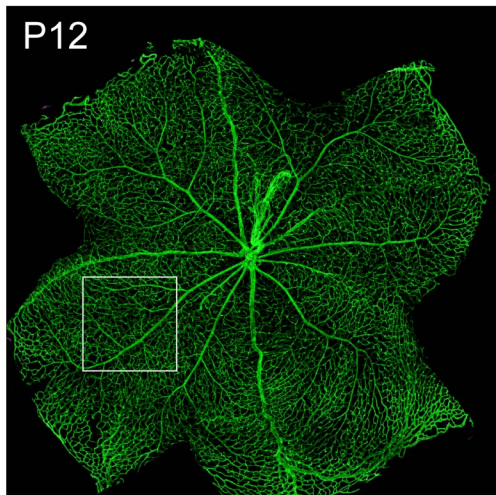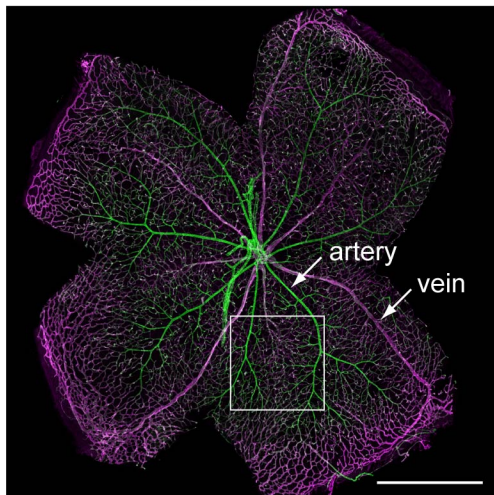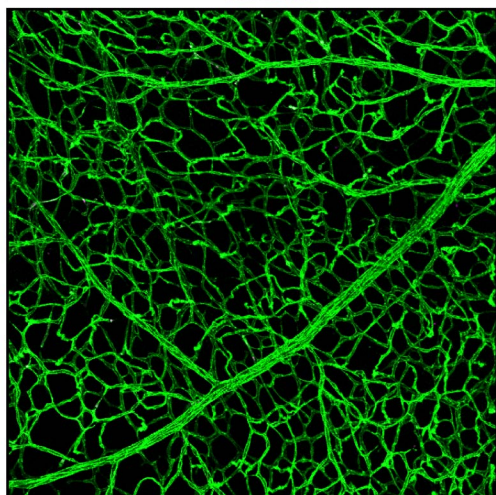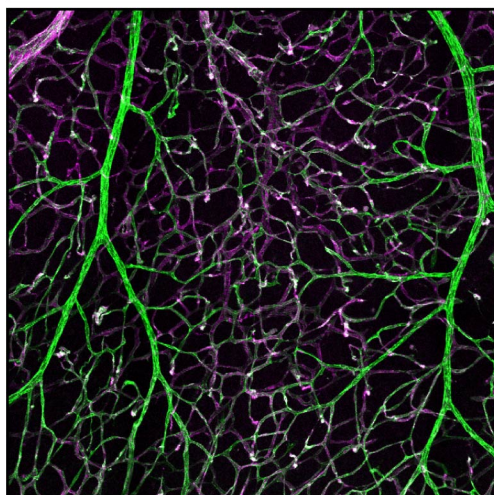

sulfo-NHS-biotin

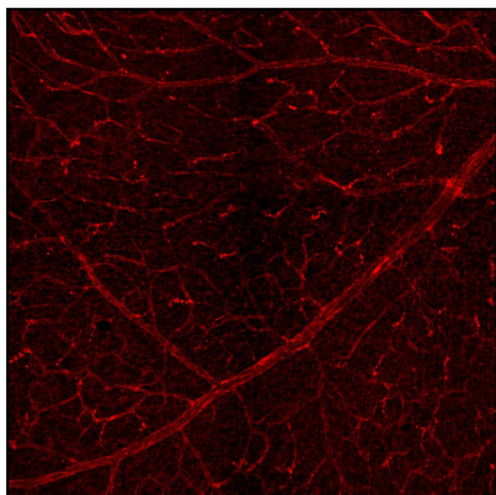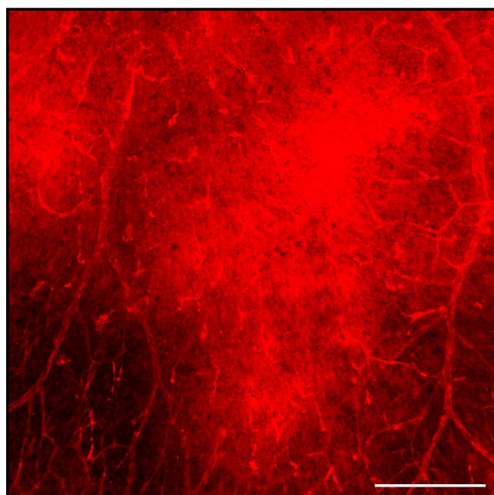

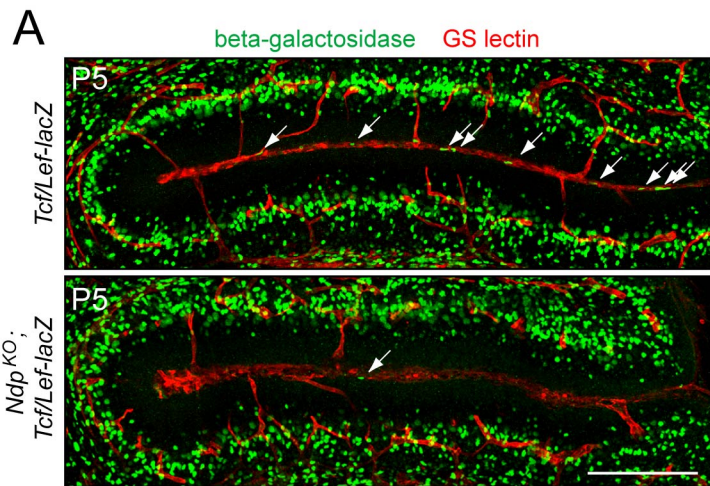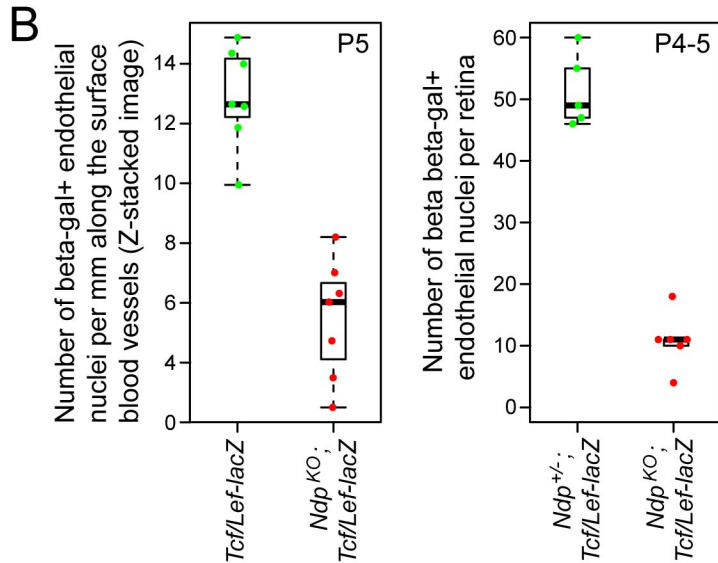

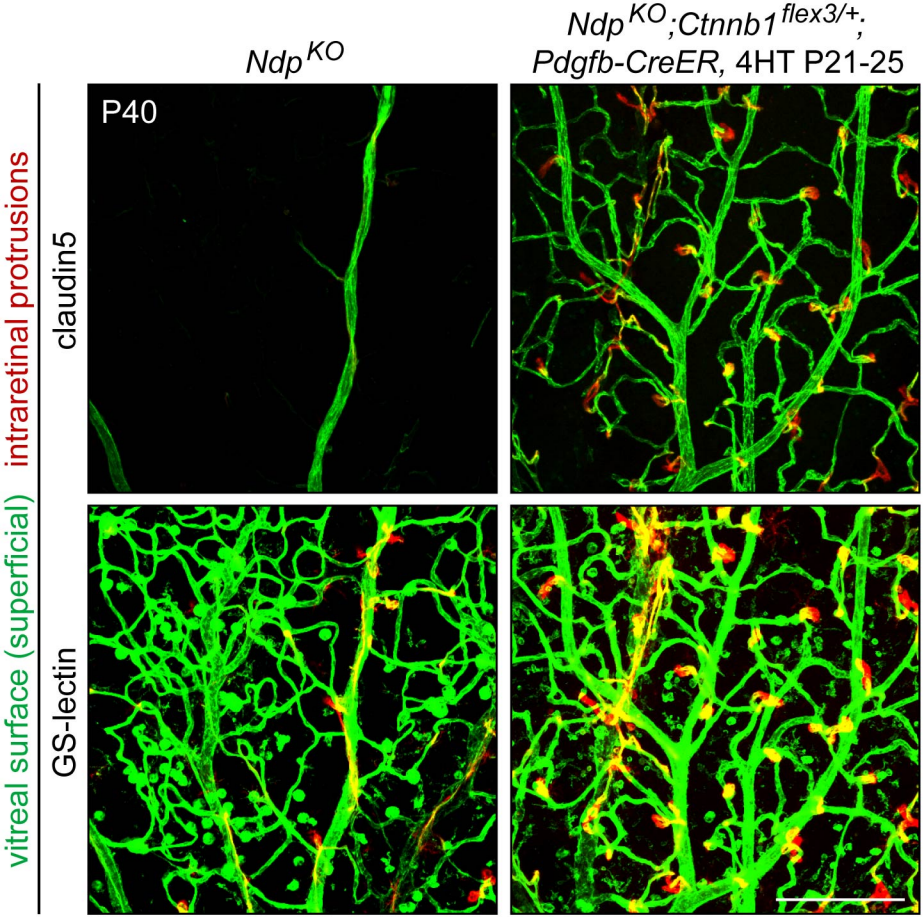

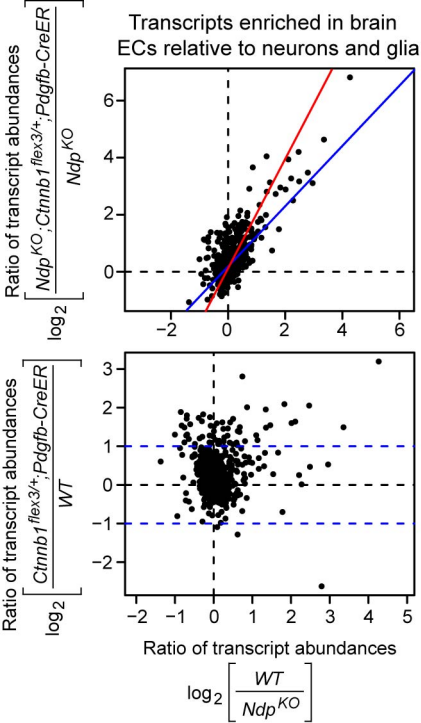

GS lectin DAPI (90 ug 4HT at P6, analyze at P10)

*Ctnnb1*<sup>CKO/dm</sup>; *Pdgfrb*-CreER

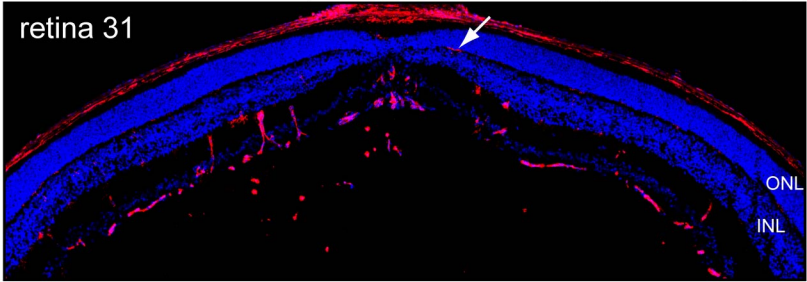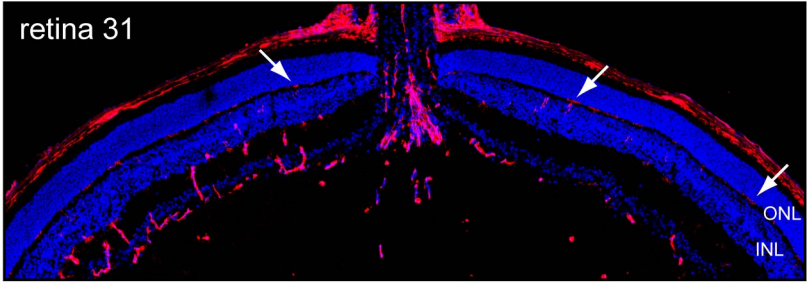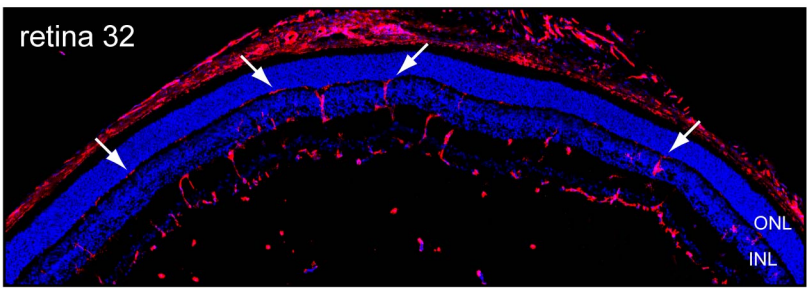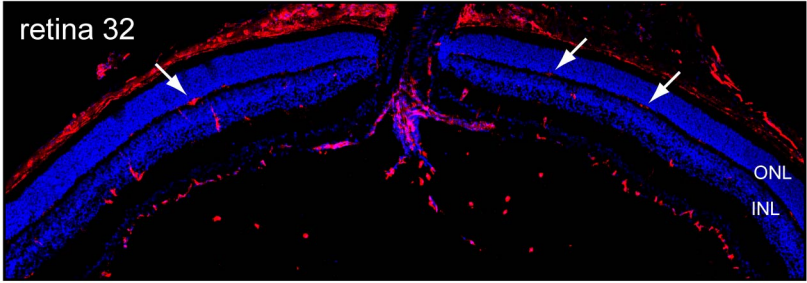

*Ctnnb1*<sup>CKO/dm</sup>

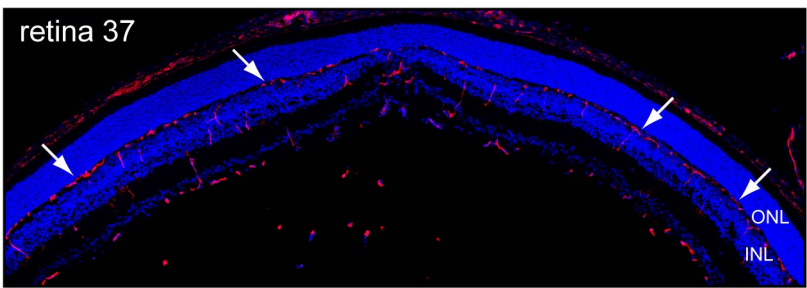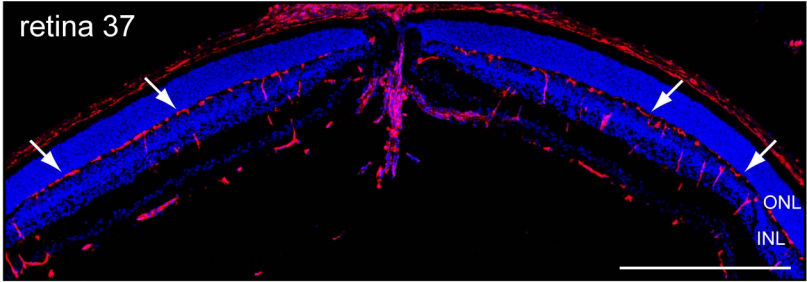

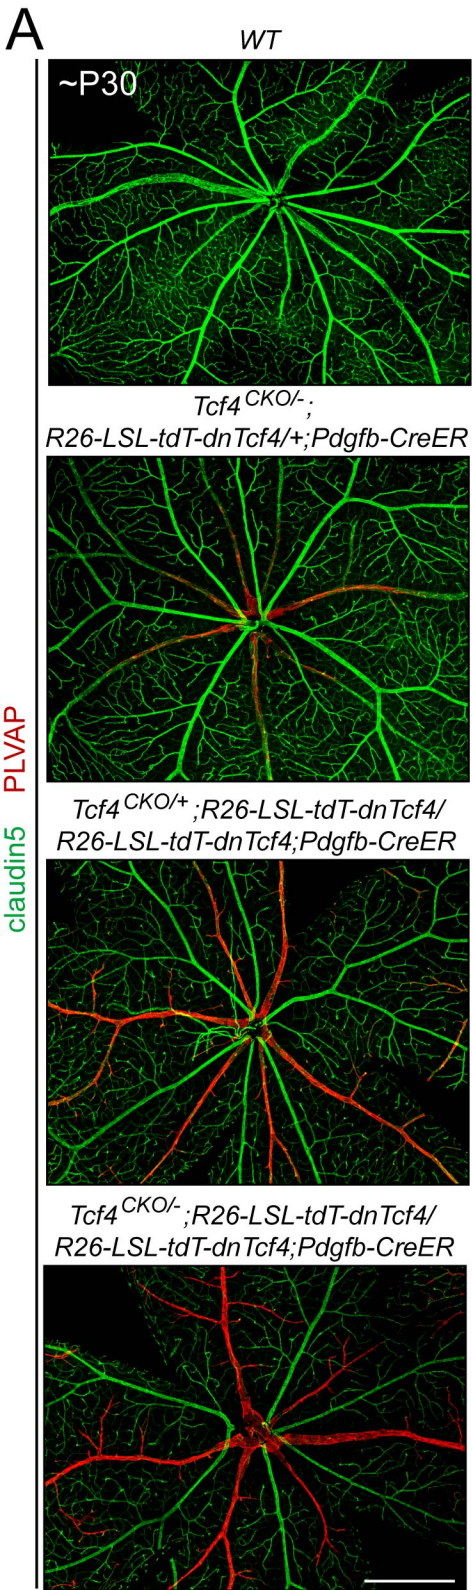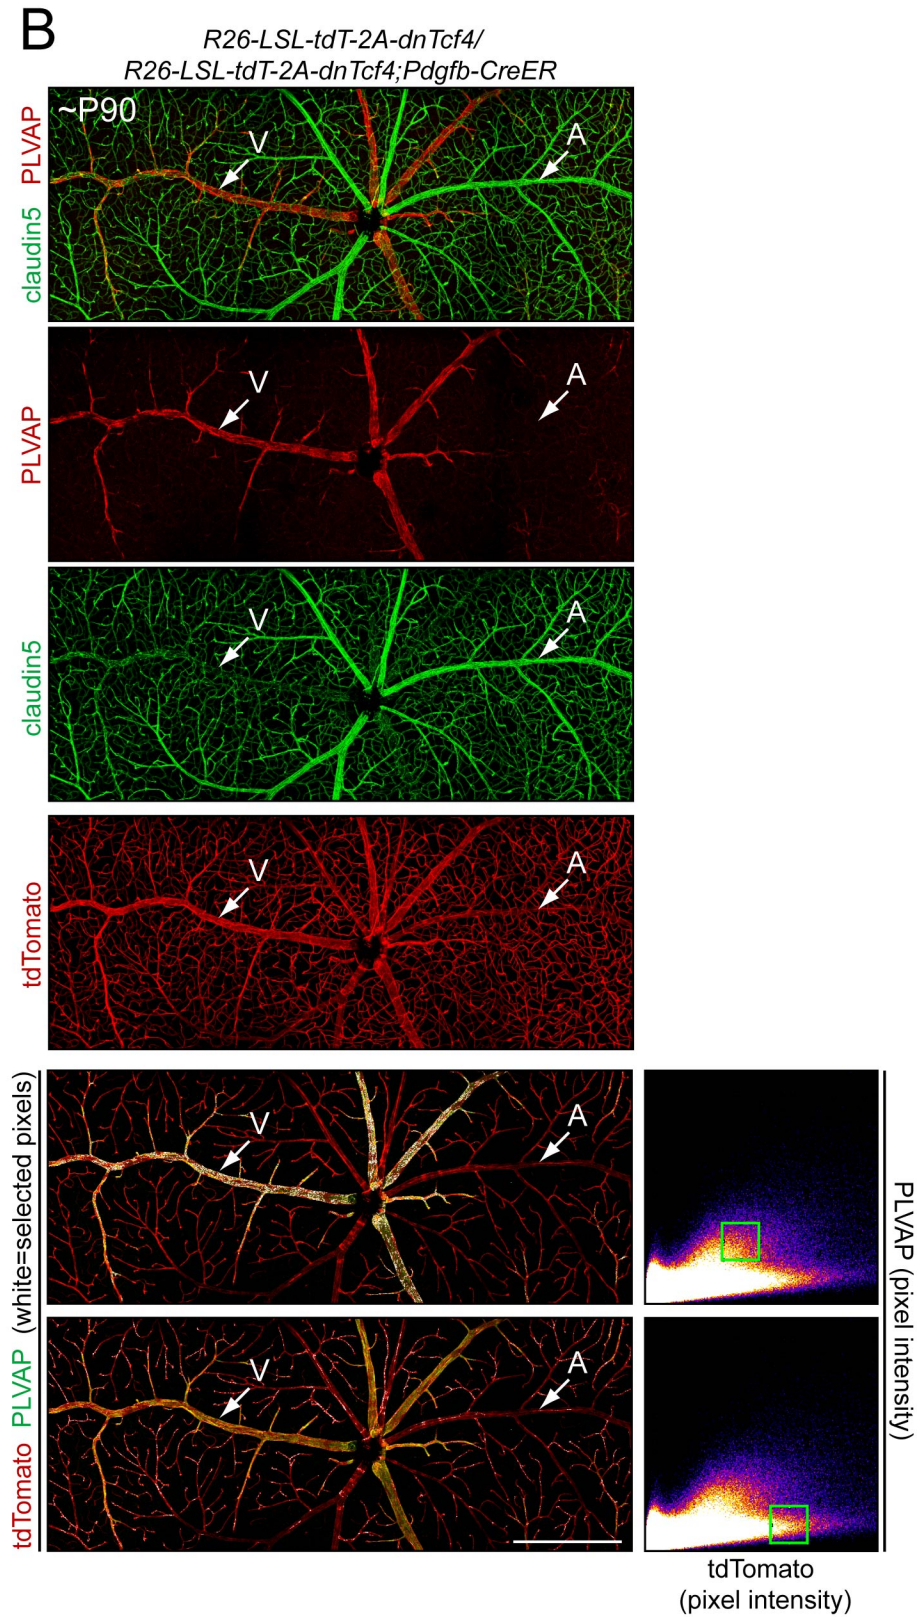

Supplement: JCI76431sd.pdf [file JCI76431sd.pdf]
